# Supplementary material
Source: PubMed Central journal article supplement (PMC6495239)
Supplement: jnm209544SupplementalData.pdf [file jnm209544SupplementalData.pdf]

**Supplemental Table 1:** Study site scanning protocol standards, with comparison to UPICT (1) standards.

| <b>Protocol feature</b>                                                                                                                                                                   | <b>Study sites</b>                                          | <b>UPICT (section in (1) supplement)</b>                                                                                                                                                     |
|-------------------------------------------------------------------------------------------------------------------------------------------------------------------------------------------|-------------------------------------------------------------|----------------------------------------------------------------------------------------------------------------------------------------------------------------------------------------------|
| Site accreditation                                                                                                                                                                        | See Materials and Methods and (2)                           | (see 2.2, 7.2)                                                                                                                                                                               |
| Fasting                                                                                                                                                                                   | ≥ 6 hours                                                   | Target: ≥ 6 hours<br>Acceptable: ≥ 4 hours (4.1.1)                                                                                                                                           |
| No vigorous exercise                                                                                                                                                                      | ≥ 24 hours                                                  | Target: ≥ 24 hours<br>Acceptable: ≥ 6 hours (4.1.3)                                                                                                                                          |
| Fasting blood glucose (non-diabetic patient)                                                                                                                                              | ≤ 175 mg/dL<br>(one with 182 mg/dL was scanned)             | Target: <150 mg/dL<br>Acceptable ≤ 200 mg/dL (4.2.2)                                                                                                                                         |
| FDG injected dose                                                                                                                                                                         | 259-407 MBq recommended<br>287-566 MBq actual               | 370-740 MBq (United States)<br>May be tailored by patient weight, 2D vs 3D scanning, acquisition time per bed position, % bed overlap (5.2)                                                  |
| Other preparation                                                                                                                                                                         | Void 45 min post-injection                                  | Adequate hydration (4.1.2, 4.2.3)<br>Void 5-10 min prior to image acquisition (4.2.3)<br>Shallow breathing or respiratory gating (7.1.1)                                                     |
| Uptake time                                                                                                                                                                               | 60 min ± 10 min post-injection                              | Target: 60 min post-injection<br>Acceptable: 55-75 min post-injection (5.3)                                                                                                                  |
| Patient position                                                                                                                                                                          | Arms up preferred                                           | Arms up preferred (7.2.1)                                                                                                                                                                    |
| Scan direction                                                                                                                                                                            | Inferior to superior, CT attenuation before PET acquisition | Inferior to superior, CT attenuation before PET acquisition (7.1.1)                                                                                                                          |
| Voxel size                                                                                                                                                                                | 4 - 5.47 mm                                                 | Target/Acceptable: Reconstructed voxel size of 3-4 mm in all 3 dimensions<br>Ideal: voxel size as small as possible with current technology (7.1.2)                                          |
| Imaging data acquisition                                                                                                                                                                  | 2-7 fields-of-view                                          | Typically 6 bed positions, 2-4 min per bed position (3D acquisition) or 3-8 min (2D acquisition); may be lowered for higher injected dose, lower body weight, higher bed overlap, etc. (7.2) |
| Reconstruction                                                                                                                                                                            | Iterative                                                   | Iterative (7.3)                                                                                                                                                                              |
| Shared features: clock synchronization, accurate patient weight, confirmation of patient preparation, record exact dose injected and residual dose in syringe, avoid/record extravasation |                                                             |                                                                                                                                                                                              |

**Supplemental Table 2:** Scan and lesion characteristics

|                                                       | <b>Same site/scanner</b><br>(n=10 patients,<br>n=51 lesions) | <b>Same institution,<br/>different scanner</b><br>(n=2 patients,<br>n=34 lesions) | <b>Different site/scanner</b><br>(n=11 patients,<br>n=77 lesions) | <b>Total</b><br>(n=23 patients,<br>n=162 lesions) |
|-------------------------------------------------------|--------------------------------------------------------------|-----------------------------------------------------------------------------------|-------------------------------------------------------------------|---------------------------------------------------|
| Lesion site                                           | <b>n (%)</b>                                                 | <b>n (%)</b>                                                                      | <b>n (%)</b>                                                      | <b>n (%)</b>                                      |
| Bone                                                  | 38 (75%)                                                     | 26 (76%)                                                                          | 18 (23%)                                                          | 82 (51%)                                          |
| Soft tissue                                           | 13 (25%)                                                     | 8 (24%)                                                                           | 59 (77%)                                                          | 80 (49%)                                          |
|                                                       | <b>median (range)</b>                                        | <b>median (values)</b>                                                            | <b>median (range)</b>                                             | <b>median (range)</b>                             |
| Injection dose (scan 1), MBq                          | 368 (354-396)                                                | 393 (387,399)                                                                     | 379 (315-566)                                                     | 379 (315-566)                                     |
| Injection dose (scan 2), MBq                          | 369 (305-381)                                                | 371 (367,375)                                                                     | 356 (287-401)                                                     | 367 (287-401)                                     |
| Absolute difference in injection dose, MBq            | 17 (1-58)                                                    | 22 (20,24)                                                                        | 44 (2-247)                                                        | 22 (1-247)                                        |
| Blood glucose (scan 1), mg/dL*                        | 92.5 (78-104)                                                | 110.5 (110,111)                                                                   | 100 (82-182)                                                      | 93 (78-182)                                       |
| Blood glucose (scan 2), mg/dL*                        | 89.5 (81-97)                                                 | 100.5 (98,103)                                                                    | 98.3 (78-143)                                                     | 94 (78-143)                                       |
| Absolute difference in blood glucose, mg/dL           | 5.8 (1-19)                                                   | 10 (7,13)                                                                         | 18 (0.3-39)                                                       | 13 (0.3-39)                                       |
| Weight (scan 1), kg                                   | 75.6 (49-93.3)                                               | 114.1 (96.3,132)                                                                  | 78.6 (60.2-129)                                                   | 76.2 (49-132)                                     |
| Weight (scan 2), kg                                   | 74.8 (49-94.9)                                               | 115.5 (97.7,133.2)                                                                | 78.6 (57.6-129)                                                   | 76.2 (49-133.2)                                   |
| Absolute difference in weight, kg                     | 0.3 (0.0-1.6)                                                | 1.3 (1.2,1.4)                                                                     | 0.8 (0.0-4.8)                                                     | 0.5 (0.0-4.8)                                     |
| Uptake time (scan 1), min                             | 60 (60-64)                                                   | 60 (60,60)                                                                        | 60 (54-66)                                                        | 60 (54-66)                                        |
| Uptake time (scan 2), min                             | 61 (58-70)                                                   | 60 (60,60)                                                                        | 60 (56-70)                                                        | 60 (56-70)                                        |
| Absolute difference in uptake time, min               | 0.5 (0-6)                                                    | 0 (0,0)                                                                           | 3 (0-11)                                                          | 2 (0-11)                                          |
| Liver SUVmean (avg of 2 scans)                        | 2.4 (1.9-2.9)                                                | 2.8 (2.4,3.1)                                                                     | 2.4 (2.0-2.9)                                                     | 2.4 (1.9-3.1)                                     |
| Liver SUVmean absolute difference                     | 0.1 (0.0-0.3)                                                | 0.2 (0.1,0.3)                                                                     | 0.2 (0.0-0.5)                                                     | 0.1 (0.0-0.5)                                     |
| Liver SUVmean absolute value of percentage difference | 5.6 (1.8-13.5)                                               | 7.2 (2.9,11.4)                                                                    | 5.9 (0.5-23.7)                                                    | 5.9 (0.5-23.7)                                    |
| Tumor SUVmax (avg of 2 scans)                         | 4.3 (1.0-18.2)                                               | 5.7 (4.4,16.8)                                                                    | 5.1 (2.0-28.8)                                                    | 5.1 (1.0-28.8)                                    |
| Tumor SUVmax absolute difference                      | 0.4 (0.0-2.3)                                                | 0.4 (0.0,2.2)                                                                     | 0.8 (0.1-19.1)                                                    | 0.6 (0.0-19.1)                                    |
| Tumor SUVmax absolute value of percentage difference  | 8.6 (0.1-48.8)                                               | 5.8 (0.2,36.7)                                                                    | 17.4 (1.3-97.0)                                                   | 11.9 (0.1-97.0)                                   |

\*In some cases, 3 glucose measurements were made from the same blood sample and the average was recorded.

**Supplemental Table 3:** Additional covariates predicting test-retest SUVmax differences. Random intercept (subject) linear mixed effects models, with each predictor added to 2-group class (same institution vs. different institution and scanner). Fitted values at 25% and 75% percentile for continuous predictors. Patient and scanner factors did not appear to substantially affect magnitude of test-retest differences, in part because of rigorous control of factors such as uptake time.

| <b>Additional predictor</b>        | <b>Fitted percent test-retest difference in tumor SUVmax for same institution *</b> | <b>95% confidence interval</b> | <b>Wald p-value</b> |
|------------------------------------|-------------------------------------------------------------------------------------|--------------------------------|---------------------|
| <b>SITE</b>                        |                                                                                     |                                |                     |
| Bone                               | 7%                                                                                  | (5%, 9%)                       | 0.07                |
| Soft tissue                        | 10%                                                                                 | (6%, 14%)                      |                     |
| <b>BMI (scan 1)</b>                |                                                                                     |                                |                     |
| Obese                              | 8%                                                                                  | (6%, 12%)                      | 0.52                |
| Not obese                          | 7%                                                                                  | (5%, 10%)                      |                     |
| <b>DAYS BETWEEN SCANS</b>          |                                                                                     |                                |                     |
| 2 days between scans               | 8%                                                                                  | (5%, 12%)                      | 0.92                |
| 14 days between scans              | 7%                                                                                  | (5%, 11%)                      |                     |
|                                    | <b>Fitted test-retest tumor SUVmax ratio for same institution†</b>                  | <b>95% confidence interval</b> | <b>Wald p-value</b> |
| <b>DIFFERENCE IN BLOOD GLUCOSE</b> |                                                                                     |                                |                     |
| 1 mg/dL higher at scan 2           | 0.997                                                                               | (0.994, 1.000)                 | 0.08                |
| 15 mg/dL higher at scan 2          | 0.956                                                                               | (0.908, 1.006)                 |                     |
| <b>DIFFERENCE IN UPTAKE TIME</b>   |                                                                                     |                                |                     |
| 1 min later at scan 1              | 1.005                                                                               | (0.990, 1.020)                 | 0.55                |
| 10 min later at scan 1             | 1.046                                                                               | (0.901, 1.215)                 |                     |
| <b>DIFFERENCE IN LIVER SUVmean</b> |                                                                                     |                                |                     |
| 6% lower at scan 2                 | 0.949                                                                               | (0.874, 1.030)                 | 0.93                |
| 4% higher at scan 1                | 0.946                                                                               | (0.866, 1.034)                 |                     |

\* Outcome is  $\log(\text{absolute percent difference} + 1)$

† Outcome is  $(\log(\text{SUVmax1}) - \log(\text{SUVmax2}))$  without absolute value, since directionality as well as magnitude is part of the relationship between outcome and predictor

**Supplemental Table 4:** SUVmax within-subject coefficient of variation (wCV), repeatability coefficient (RC) and 95% confidence intervals, calculated using the same methodology as prior studies (3,4).

| Difference score                             | N   | wCV* | Lower 95%<br>RC† | Upper 95%<br>RC† | 95% CI for<br>lower RC‡ | 95% CI for<br>upper RC‡ |
|----------------------------------------------|-----|------|------------------|------------------|-------------------------|-------------------------|
| 7 most FDG-avid lesions§                     | 109 | 19%  | -38%             | 62%              | -43% to -33%            | 50% to 76%              |
| Same institution only                        | 61  | 9%   | -21%             | 26%              | -25% to -17%            | 20% to 33%              |
| Different institution only                   | 48  | 22%  | -42%             | 73%              | -50% to -34%            | 51% to 99%              |
| Single most FDG-avid<br>lesion at first scan | 23  | 22%  | -42%             | 72%              | -50% to -32%            | 47% to 102%             |
| Average of 7 most FDG-<br>avid lesions       | 23  | 17%  | -36%             | 55%              | -45% to -25%            | 32% to 82%              |

\* Eq. 4 in (3); differs from Table 2 in (5) because values are log-transformed before the difference is calculated.

† Eq. 5 in (3) and (4)

‡ CI for limits of agreement (6)

§ linear mixed effects model with random intercept (4)

**Supplemental Figure 1:** Bland-Altman plots of **SULpeak** for repeated scans: **A)** 10 patients (51 lesions) with repeat scans using the same scanner; **B)** 2 patients (34 lesions) with repeat scans using different scanners from the same unit; **C)** 11 patients (77 lesions) with repeat scans using different scanners from different sites. Within each panel, plotting character/color is the same for multiple lesions in a single patient. Average difference and 95% limits of agreement are shown with dashed lines. The two lesions from a melanoma patient are not shown on panel C but contribute to limits of agreement calculations. Shown on the same scale as for SUVmax, absolute difference in lesion SULpeak was small for test-retest at the same institution, and larger for studies conducted with network sites. This SULpeak measure has the lean-body-mass correction, approximate ROI volume, and mean uptake (rather than uptake for hottest pixel) recommended by PERCIST 1.0, although the ROI shape is cubic instead of spherical. Fitted percent difference in repeat scans (comparable to Model 2 in Table 3) is 6% (4%-9%, 95% confidence interval) for the same scanner/model condition and 19% (12%-28%) for different manufacturer/institution.

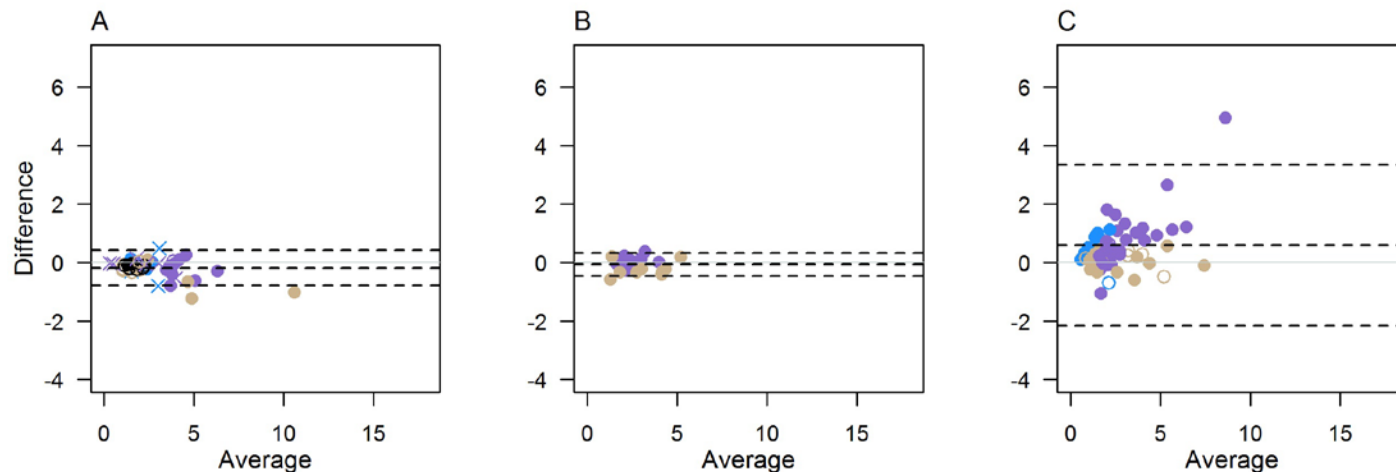

**Supplemental Figure 2:** Percentage difference in SUVmax versus average SUVmax: **A)** 12 patients (85 lesions) with repeat scans using the same scanner or different scanners from the same unit (combined Fig. 1A and B data); **B)** 11 patients (77 lesions) using different scanners from different sites. Plotting character/color identifies multiple lesions in a single patient, as for Fig. 1. Solid grey lines (—) = estimated 95% repeatability coefficients (from Supplemental Table 4, centered around zero (5)). Orange lines (—) = consensus SUVmax 95% limits of same-scanner repeatability (4,7).

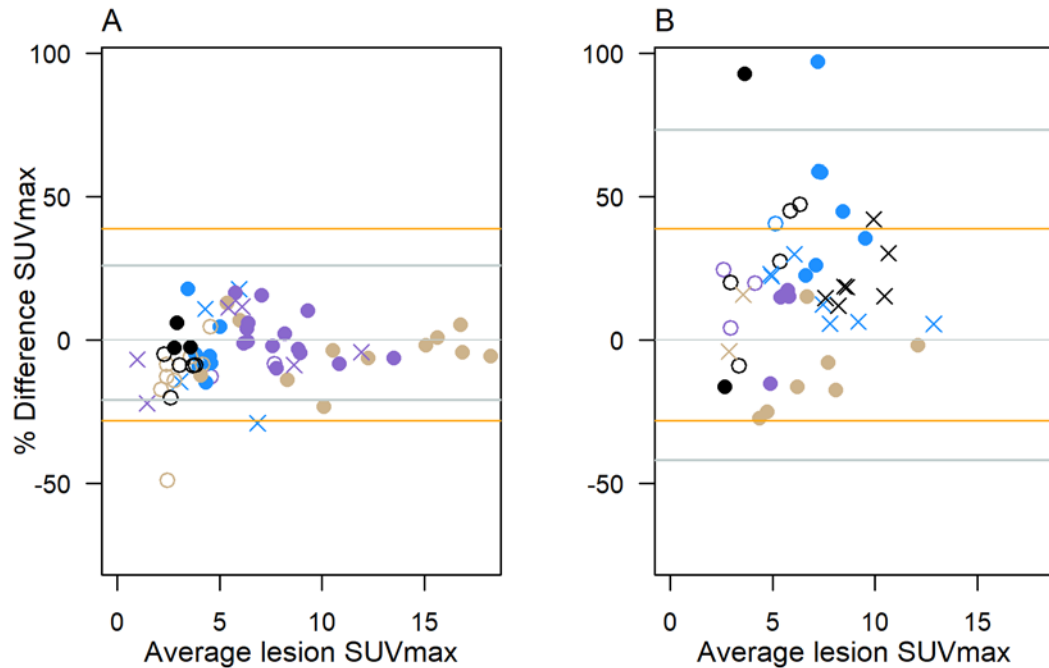

## REFERENCES

1. Graham MM, Wahl RL, Hoffman JM, et al. Summary of the UPICT protocol for 18F-FDG PET/CT imaging in oncology clinical trials. *J Nucl Med.* 2015;56:955-961.
2. Byrd DW, Doot RK, Allberg KC, et al. Evaluation of cross-calibrated 68Ge/68Ga phantoms for assessing PET/CT measurement bias in oncology imaging for single- and multicenter trials. *Tomography.* 2016;2:353-360.
3. Velasquez LM, Boellaard R, Kollia G, et al. Repeatability of 18F-FDG PET in a multicenter phase I study of patients with advanced gastrointestinal malignancies. *J Nucl Med.* 2009;50:1646-1654.
4. Weber WA, Gatsonis CA, Mozley PD, et al. Repeatability of 18F-FDG PET/CT in advanced non-small cell lung cancer: Prospective assessment in 2 multicenter trials. *J Nucl Med.* 2015;56:1137-1143.
5. Lodge MA. Repeatability of SUV in oncologic (18)F-FDG PET. *J Nucl Med.* 2017;58:523-532.
6. Bland JM, Altman DG. Measuring agreement in method comparison studies. *Stat Methods Med Res.* 1999;8:135-160.
7. QIBA Profile: FDG-PET/CT as an imaging biomarker measuring response to cancer therapy version 1.13 (technically confirmed version). [http://qibawiki.rsna.org/images/1/1f/QIBA\\_FDG-PET\\_Profile\\_v113.pdf](http://qibawiki.rsna.org/images/1/1f/QIBA_FDG-PET_Profile_v113.pdf). Updated November 18, 2016. Accessed January 29, 2018.
